# Supplementary material for: Exercise Therapy Modulates Prefrontal Neuroplasticity in Chronic Neck Pain: Insights from fNIRS and Clinical Outcomes
Source: Research Square preprint supplement (doi:10.21203/rs.3.rs-7295262/v1), 2025-09-09
Supplement: Supplementary file 1 [file 5f3a924b381f5d2b4157a852.docx]

# Supplementary Material 1: Medication Exclusion Criteria

## Rationale

Participants were excluded if currently using medications that may:

- Alter pain perception or central sensitization
- Modulate cortical hemodynamics (fNIRS signals)
- Affect motor/cognitive function during exercise

Note: All medications were screened via self-report and verified through medical records.

## Medication Classes and Specific Agents

[按药理机制分类，提供通用名（非商品名）]

### 1. Analgesics

| **Class** | **Specific Agents** | **Exclusion Threshold** |
| --- | --- | --- |
| Opioid agonists | Morphine, Oxycodone, Tramadol | Any current use |
| NSAIDs | Ibuprofen, Diclofenac, Celecoxib | Chronic use (>3 doses/week) |

### 2. Psychotropic Agents

| **Class** | **Specific Agents** | **Exclusion Threshold** |
| --- | --- | --- |
| Antidepressants | Amitriptyline, Duloxetine, Venlafaxine | Any current use |
| Anxiolytics/Sedatives | Diazepam, Alprazolam, Zolpidem | Any current use |
| Anticonvulsants | Pregabalin, Gabapentin | Any current use |

### 3. CNS-Acting Agents

| **Class** | **Specific Agents** | **Exclusion Threshold** |
| --- | --- | --- |
| Muscle relaxants | Baclofen, Tizanidine | Any current use |
| Dopaminergic agents | Levodopa, Pramipexole | Any current use |

### 4. Other Excluded Agents

- **Systemic corticosteroids**: Prednisone (>10 mg/day for >2 weeks)
- **Antihistamines**: Diphenhydramine (chronic use)
- **Stimulants**: Methylphenidate, Modafinil

## Washout Period Exceptions

Participants were eligible if:

- NSAIDs were discontinued ≥72 hours prior to baseline assessments
- Short-acting analgesics (e.g., acetaminophen) were used ≤1 dose/week
